# Supplementary material for: Homologous V2O3/C box-in-box and V2O5 box for lithium-ion full cells
Source: Royal Society of Chemistry journal article supplement (doi:10.1039/c6ta03335k), 2016-01-01
Supplement: c6ta03335k1.pdf [file c6ta03335k1.pdf]

*Supporting information*

**Homologous  $V_2O_3/C$  box-in-box and  $V_2O_5$  box for lithium-ion full cells**

*Xue Liu, Yanjie Hu, Guiqi Jia, Haoxuan Zhang, Hao Jiang\*, Chunzhong Li\**

Key Laboratory for Ultrafine Materials of Ministry of Education, School of Materials Science and Engineering, East China University of Science and Technology, Shanghai 200237, China

\*Corresponding author: Tel.: +86-21-64250949, Fax: +86-21-64250624

E-mail: [jjianghao@ecust.edu.cn](mailto:jjianghao@ecust.edu.cn) (Prof. H. Jiang) and [czli@ecust.edu.cn](mailto:czli@ecust.edu.cn) (Prof. C. Z. Li)

## 1. Experimental Section

**Synthesis of  $V_2O_3$  NPs.** The  $VO_x$  precursors were firstly synthesized according to Balkus' work with a minor revision.<sup>1</sup> In a typical synthesis, 0.3 g of ammonium metavanadate and 0.5 g of P123 ( $EO_{20}P_{70}E_{20}$ ) were dispersed into 30 mL of deionized water containing 2 mL of 1 M  $HNO_3$  under stirring for 7 h at room temperature, and then transferred into an autoclave and maintained at 200 °C for 12 h. Finally, the  $V_2O_3$  NPs can be obtained by treating as-obtained hydrothermal products at 600 °C for 10 h in argon.

**Synthesis of  $V_2O_3$  HNSs.** The synthesis of  $V_2O_3$  HNSs was according to Lou's work with a minor revision.<sup>2</sup> In a typical synthesis, 3 mL of 0.33 M  $VOC_2O_4$  and 30 mL of isopropanol were mixed in a 50 mL autoclave under stirring for 1 h and then heated at 200 °C for 10 h. The  $V_2O_3$  HNSs can be obtained by annealing the precursor in argon at 600 °C for 10 h.

## 2. Figures

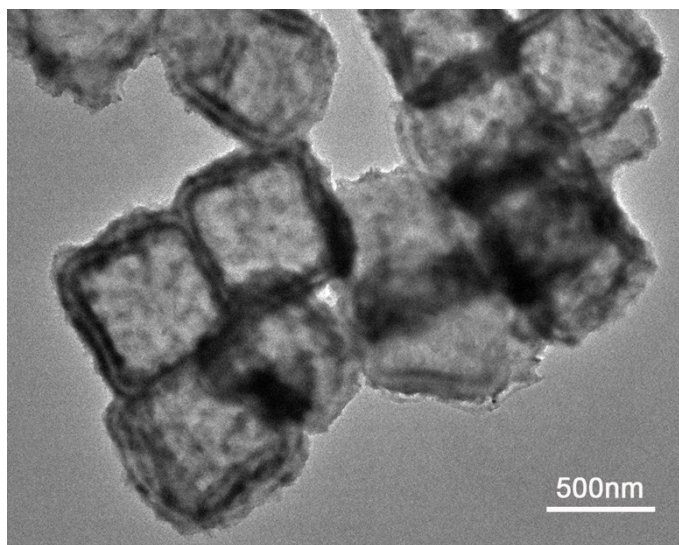

**Figure S1.** TEM image of the carbon box-in-box.

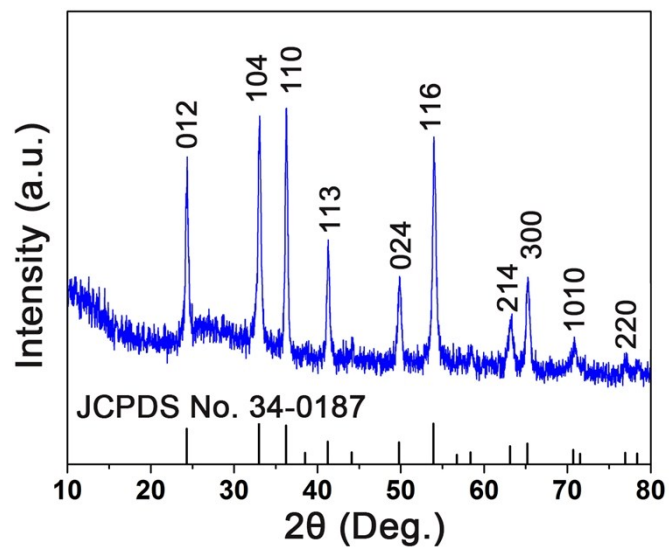

**Figure S2.** XRD pattern of the V<sub>2</sub>O<sub>3</sub>/C box-in-box.

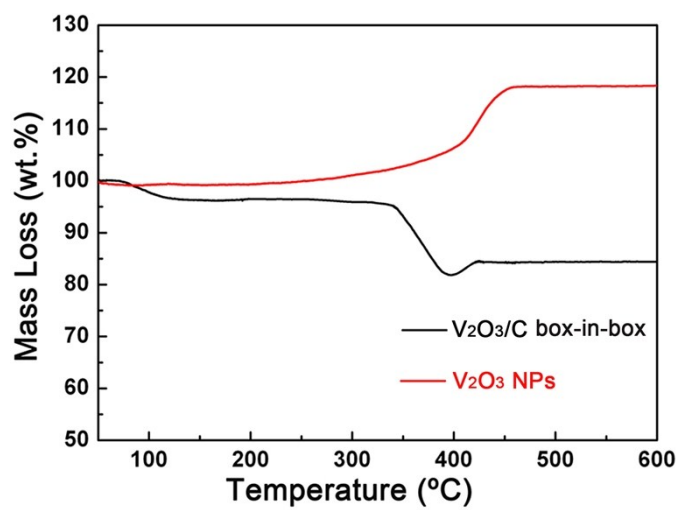

**Figure S3.** TGA curves of V<sub>2</sub>O<sub>3</sub>/C box-in-box and V<sub>2</sub>O<sub>3</sub> NPs.

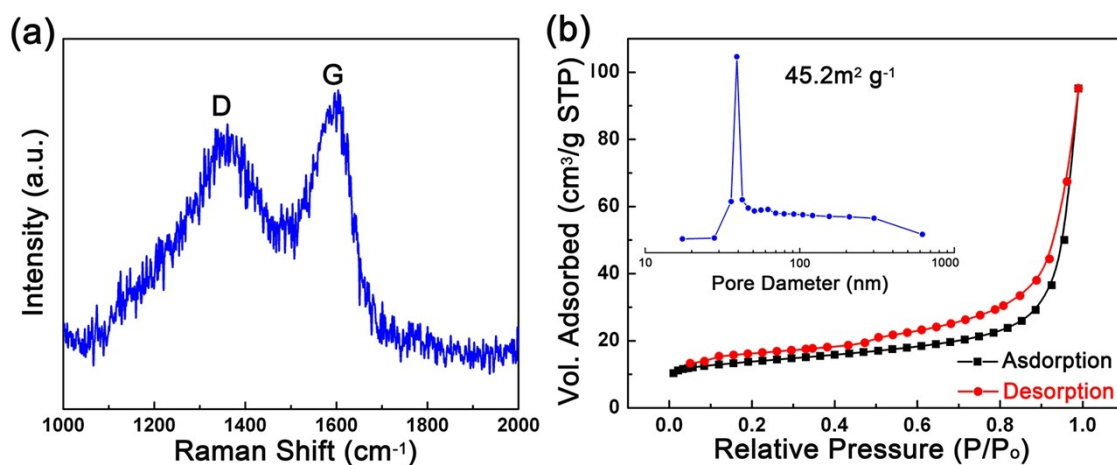

**Figure S4.** (a) Raman spectrum and (b) N<sub>2</sub> adsorption-desorption isotherms of the V<sub>2</sub>O<sub>3</sub>/C box-in-box (the insert of part b shows the corresponding pore-size distribution curve).

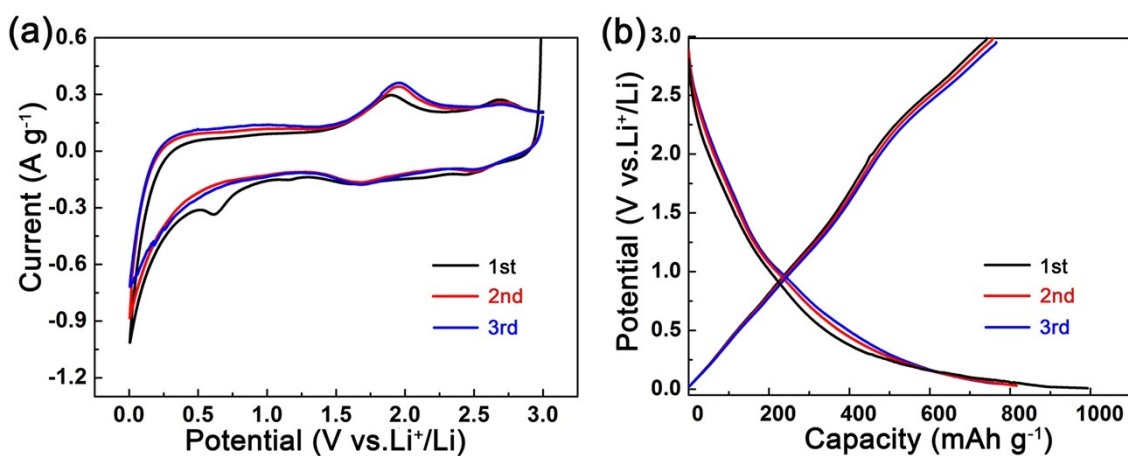

**Figure S5.** (a) CV curves at 0.2 mV s<sup>-1</sup>, (b) charge-discharge curves at 100 mA g<sup>-1</sup> of the V<sub>2</sub>O<sub>3</sub>/C box-in-box for the initial 3 cycles.

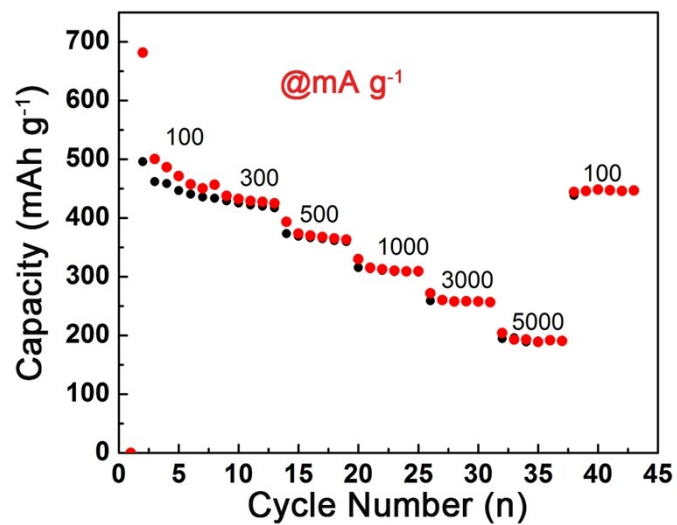

**Figure S6.** Rate performance of the pure carbon box electrodes.

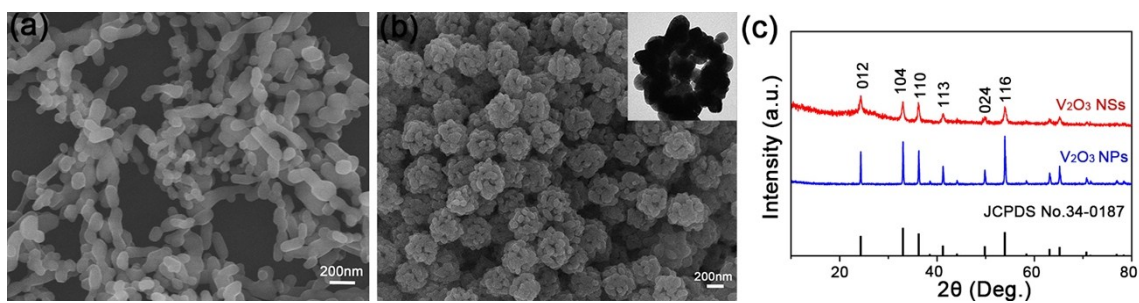

**Figure S7.** (a) SEM image of  $V_2O_3$  NPs, (b) SEM image of  $V_2O_3$  HNSs (the inset showing the corresponding TEM image), (c) XRD patterns of  $V_2O_3$  HNSs (red line) and  $V_2O_3$  NPs (blue line).

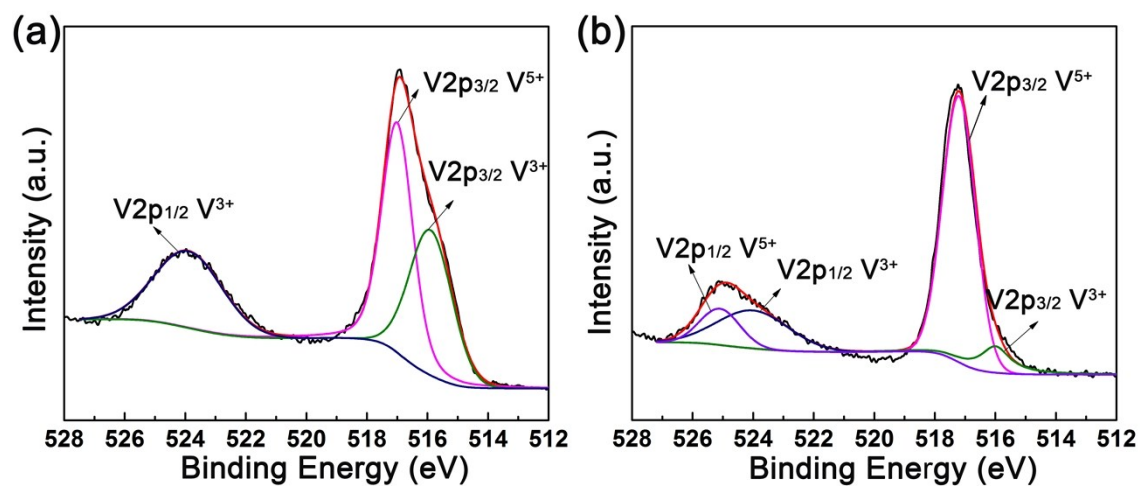

**Figure S8.** High-resolution V2p XPS spectra of the V<sub>2</sub>O<sub>3</sub>/C box-in-box (a) before cycling and (b) after cycling.

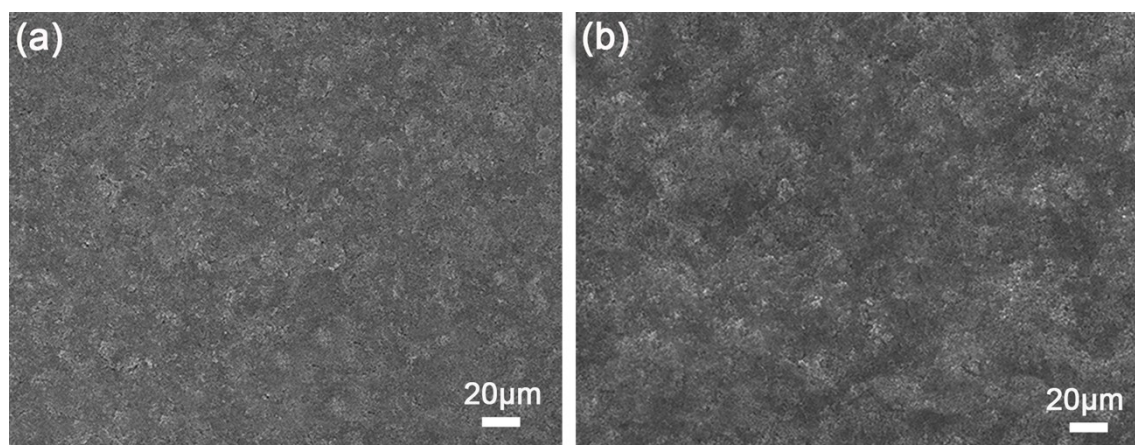

**Figure S9.** SEM images of the V<sub>2</sub>O<sub>3</sub>/C electrode (a) before cycles and (b) after cycles.

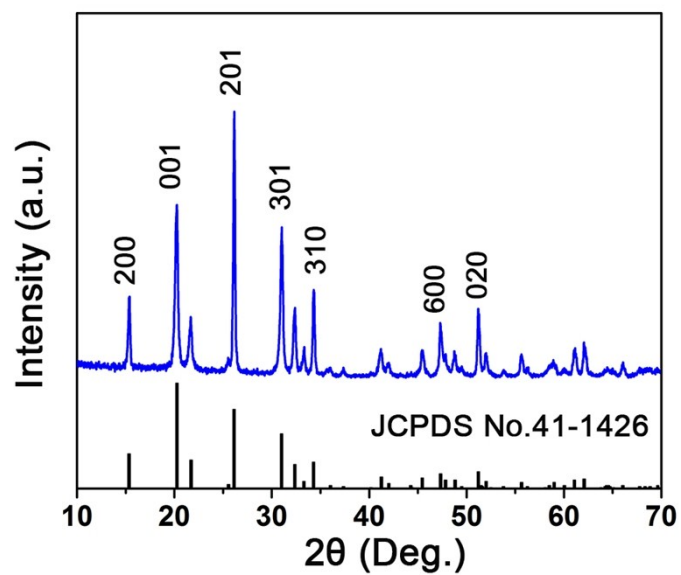

Figure S10. XRD pattern of the  $V_2O_5$  box.

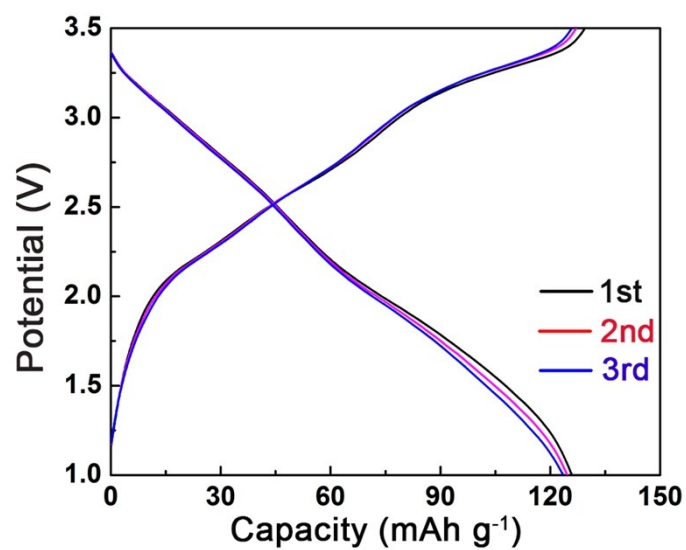

Figure S11. Charge-discharge curves at  $100 \text{ mA g}^{-1}$  of the full cell for the initial 3 cycles.

### 3. Table

**Table S1.** A summary table for recent reports on lithium-ion full cells.

| Cathode                                                              | Anode                                           | Rate capability                                                                                     | Cycling behavior                                                  | Ref.             |
|----------------------------------------------------------------------|-------------------------------------------------|-----------------------------------------------------------------------------------------------------|-------------------------------------------------------------------|------------------|
| Ni <sub>1/3</sub> Mn <sub>1/3</sub> Co <sub>1/3</sub> O <sub>2</sub> | Si/RGO                                          | -                                                                                                   | 77 mAh g <sup>-1</sup> (70%)<br>1/4C for 15 cycles                | S3               |
| LiMn <sub>2</sub> O <sub>4</sub>                                     | MnO <sub>x</sub> /C                             | 85 mAh g <sup>-1</sup> (0.2C)<br>25 mAh g <sup>-1</sup> (5C)                                        | -                                                                 | S4               |
| LiCoPO <sub>4</sub>                                                  | Li <sub>4</sub> Ti <sub>5</sub> O <sub>12</sub> | -                                                                                                   | 93 mAh g <sup>-1</sup> (76%)<br>0.1 C for 20 cycles               | S5               |
| LiNi <sub>0.5</sub> Mn <sub>1.5</sub> O <sub>4</sub>                 | CuO-MCMB                                        | 125 mAh g <sup>-1</sup> (1C)<br>95 mAh g <sup>-1</sup> (5C)                                         | -                                                                 | S6               |
| LiMn <sub>2</sub> O <sub>4</sub>                                     | Mn <sub>2</sub> O <sub>3</sub>                  | -                                                                                                   | 80 mAh g <sup>-1</sup> (81%)<br>1C for 40 cycles                  | S7               |
| LiMn <sub>2</sub> O <sub>4</sub>                                     | TNSTs                                           | 100 mAh g <sup>-1</sup> (0.2 A g <sup>-1</sup> )<br>58 mAh g <sup>-1</sup> (1.6 A g <sup>-1</sup> ) | -                                                                 | S8               |
| <b>V<sub>2</sub>O<sub>5</sub></b>                                    | <b>V<sub>2</sub>O<sub>3</sub>/C</b>             | <b>130 mAh g<sup>-1</sup> (2/3 C)</b><br><b>43 mAh g<sup>-1</sup> (33 C)</b>                        | <b>81 mAh g<sup>-1</sup> (80%)</b><br><b>3.3 C for 100 cycles</b> | <b>This work</b> |

The specific capacities of all those full cells shown in the table are based on the cathode material weight. For this work, 1 C=0.15 A g<sup>-1</sup>.

### 4. References

- 1 C. Xiong, A. E. Aliev, B. Gnade, Jr. K. J. Balkus, *ACS Nano* 2008, **2**, 293.
- 2 A. Pan, H. B. Wu, L. Yu, X. W. Lou, *Angew. Chem.* 2013, **52**, 2226.
- 3 L. Ji, H. Zheng, A. Ismach, Z. Tan, S. Xun, E. Lin, V. Battaglia, V. Srinivasan, Y. Zhang, *Nano Energy* 2011, **1**, 164.
- 4 C. Chae, H. Park, D. Kim, J. Kim, E. S. Oh, J. K. Lee, *J. Power Sources* 2013, **244**, 214.
- 5 J. Ni, W. Liu, J. Liu, L. Gao, J. Chen, *Electrochem. Commun.* 2013, **35**, 1.
- 6 R. Verrelli, J. Hassoun, A. Farkas, T. Jacob, B. Scrosati, *J. Mater. Chem. A* 2013, **1**, 15329.
- 7 Y. Wang, Y. Wang, D. Jia, Z. Peng, Y. Xia, G. Zheng, *Nano Lett.* 2014, **14**, 1080.
- 8 H. Ming, P. Kumar, W. Yang, Y. Fu, J. Ming, W. J. Kwak, L. J. Li, Y. K. Sun, V. Zheng, *ACS Sustainable Chem. Eng.* 2015, **3**, 3086.
